# Supplementary material for: The joint effect between body mass index and waist circumference in the risk of heart disease: A national longitudinal cohort study
Source: Research Square preprint supplement (doi:10.21203/rs.3.rs-8180481/v1), 2026-01-12
Supplement: Supplementary file 1 [file 00c9440f3619f456e0e3c525.docx]

**Table S1.** Association of BMI and WC with cardiovascular disease before multiple imputations of missing covariates (n=8062).

| Variable | **Model 1** | |  | **Model 2** | |  | **Model 3** | |
| --- | --- | --- | --- | --- | --- | --- | --- | --- |
| **HR (95%CI)** | **P value** |  | **HR (95%CI)** | **P value** |  | **HR (95%CI)** | **P value** |
| Continues |  |  |  |  |  |  |  |  |
| BMI | 1.05 (1.04~1.06) | <0.001 |  | 1.05 (1.04~1.06) | <0.001 |  | 1.04 (1.02~1.05) | <0.001 |
| BMI. group |  |  |  |  |  |  |  |  |
| Group.1 | 1(Ref) |  |  | 1(Ref) |  |  | 1(Ref) |  |
| Group.2 | 1.67 (1.48~1.88) | <0.001 |  | 1.65 (1.46-1.86) | <0.001 |  | 1.65 (1.46~1.86) | <0.001 |
| Continues |  |  |  |  |  |  |  |  |
| WC | 1.02 (1.02~1.03) | <0.001 |  | 1.02 (1.02-1.03) | <0.001 |  | 1.02 (1.02~1.03) | <0.001 |
| WC. group |  |  |  |  |  |  |  |  |
| Group.1 | 1(Ref) |  |  | 1(Ref) |  |  | 1(Ref) |  |
| Group.2 | 1.31 (1.2~1.43) | <0.001 |  | 1.39 (1.27-1.53) | <0.001 |  | 1.39 (1.27~1.53) | 0.001 |

Model 1 unadjusted model.

Model 2 adjusted for age, sex, marry state, rural.

Model 3 adjusted for age, sex, marry state, rural, smoke, drink, WBC, Platelet, HGB, hypertension, diabetes, cancer, lung disease, stroke, liver disease, renal disease, digestive disease, asthma.

BMI. group 1:＜28kg/m2, BMI. group 2: ≥ 28kg/m2

WC. group1: male＜85cm, female＜80cm, WC. group2: male ≥ 85cm, female ≥ 80cm.
