# Supplementary material for: The joint effect between body mass index and waist circumference in the risk of heart disease: A national longitudinal cohort study
Source: Research Square preprint supplement (doi:10.21203/rs.3.rs-8180481/v1), 2026-01-12
Supplement: Supplementary file 3 [file f706202cf4a156b505b74ba9.docx]

# Joint effect between body mass index and waist circumference in the risk of heart disease: A national cohort study

Short title: The joint effect between body mass index and waist circumference in the risk of heart disease

*Xiaodi Tang,* *MD1, Hong Chen, MM1, Xingming Zhong,MS2, Yijiang Zhao, MD3, Kexi Zhang, MM4, Ying Xie,MD5, Yosen Yang, MM6, Rong He**, MD, PhD7*, Ping Zhang, MD7,*

*1**Department of Cardiovascular Medicine, Tsinghua University Affiliated Beijing Tsinghua Changgung Hospital, 168 Litang Road, Changping District, Beijing, China*

*2School of Kinesiology and Health, Capital University of Physical Education and Sports, 11 West Beisanhuan Road, Haidian District, Beijing, China*

*3Department of Cardiovascular Medicine, Tsinghua University Affiliated Beijing Tsinghua Changgung Hospital, 168 Litang Road, Changping District, Beijing, China*

*4Department of Cardiovascular Medicine, Tsinghua University Affiliated Beijing Tsinghua Changgung Hospital, 168 Litang Road, Changping District, Beijing, China*

*5Department of Cardiovascular Medicine, Tsinghua University Affiliated Beijing Tsinghua Changgung Hospital, 168 Litang Road, Changping District, Beijing, China*

*6Department of Cardiovascular Medicine, Tsinghua University Affiliated Beijing Tsinghua Changgung Hospital, 168 Litang Road, Changping District, Beijing, China*

*7Department of Cardiovascular Medicine, Tsinghua University Affiliated Beijing Tsinghua Changgung Hospital, 168 Litang Road, Changping District, Beijing, China*

**Corresponding author:* *Rong He, Email: dr_herong@sina.com.*

*The word count of the manuscript excluding the title page, abstract(s), and references: 2073*

The word count of the manuscript excluding the title page, abstract(s), and references: 2073

**Abstract**

**Background:**

The primary aim of this study is to investigate the association and joint effects of BMI and WC in the risk of heart disease.

**Methods:**

A retrospective cohort study was conducted involving 11,700 participants from the China Health and Retirement Longitudinal Study with 9 years following up. For all analyses, we imputed missing data of the covariates by using multiple imputations. The Cox proportional hazards model and propensity score matching (PSM) were used to exclude confounding factors. The additive interaction test was to explore the joint effect of BMI and WC.

**Results:**

During a median follow-up of 8.49 years, 2055 (17.6%) people were diagnosed with heart disease. Upon full adjustment model and after PSM, a positive association was observed between BMI (HR: 1.41, 95% CI: 1.21-1.63), WC (HR: 1.22, 95% CI: 1.09-1.36) and the risk of heart disease. The joint effect (HR: 1.54, 95% CI: 1.34-1.77) of BMI and WC was higher than the simple effect.

**Conclusions:**

This cohort study demonstrated a significant association and joint effect between both high levels of BMI as well as high levels of WC and the risk of heart disease among individuals with Chinese people.

**Keywords** body mass index, waist circumference, heart disease, association, joint effect.

# Introduction

## Despite the introduction of new guidelines, medications, and technologies, heart disease morbidity and mortality rates in China continue to increase on an annual basis [1]. According to the Annual Report on Cardiovascular Health and Disease in China (2022), the prevalence of heart disease in China has risen significantly, affecting approximately 330 million people, including a large number of patients suffering from stroke, coronary artery disease, heart failure, and other related diseases [2, 3].

## Furthermore, up to 50.7% of Chinese adults are overweight or obese, which may serve to exacerbate the burden of heart disease[4]. However, body mass index (BMI), a commonly used metric for assessing obesity, may not adequately reflect an individual's cardiovascular metabolic risk[5]. While BMI is a simple calculated value based on height and weight, it does not directly measure body fat or its distribution. For instance, individuals with a normal BMI but abdominal obesity exhibit an elevated risk of mortality and cardiovascular events[6]. This information is not discernible through BMI alone. Waist circumference (WC) and other body measurements can be employed as supplementary tools to more precisely assess abdominal fat and associated cardiovascular risk[7]. For instance, waist circumference measurements can assist in identifying individuals with a normal BMI but still at high risk for cardiovascular disease[8, 9].

## The objective of this study is to investigate the relationship between BMI, WC, and heart disease, as well as their combined effects, in a large Chinese population.

# Methods

**Study design**

We utilized data from the China Health and Retirement Longitudinal Study (CHARLS)[10], a nationally representative longitudinal survey that gathers information from individuals aged 45 years and above in China[11]. The survey covers a wide range of data including economic status, physical and psychological health, demographics, and social networks[12]. Anthropometric indicators and cardiometabolic diseases are also assessed in CHARLS. The initial national baseline survey of CHARLS was conducted in 2011, with 17,385 individuals from 150 counties/districts and 450 villages/resident communities participating. Subsequently, participants were followed up every 2 years. This study was approved by the Biomedical Ethics Review Committee of Peking University, and all participants provided signed informed consent forms[1, 13].

**Study population**

All participants recruited in the national baseline survey were included if they met the following criteria: (1) no history of heart disease at baseline; (2) successful collection of BMI and WC; and (3) successful follow-up. Ultimately, 11,700 individuals without any heart disease at baseline in 2011 were included (**Figure 1**).

**BMI and WC measurements**

BMI is calculated as weight (kg) divided by the square of height (m). Height and weight are measured using a stadiometer and a weighing scale, with participants barefoot and in light clothing. When measuring waist circumference, trained measurers use a flexible tape measure to encircle the waist at the level of the navel.

**Outcome and follow-up**

Heart disease was defined as self-report of a physician's diagnosis, indicated by a positive response to the question "Have you been diagnosed with any heart disease, including angina, myocardial infarction, coronary heart disease, or any other heart problems?" based on the CHARLS questionnaire.

The outcome of this study was the occurrence of incident heart disease, identified through a self-reported physician diagnosis. This was determined by a positive response to the question, "Have you been diagnosed with any heart disease, including angina, myocardial infarction, coronary heart disease, or any other heart problems?" Participants were monitored from the baseline year of 2011 until the onset of heart disease or the date of the most recent survey in 2020, whichever occurred first.

**Covariates**

Covariates included Social demographic characteristics, lifestyle factors, laboratory examination and current disease status [20]. Social demographic characteristics included age, sex, marital status and residence (rural/urban). Lifestyle factors included smoking status (ever smoking/never smoking) and drinking status (ever drinking/never drinking).Laboratory examination at baseline 2011 include white blood cell count (WBC), mean corpuscular volume (MCV), platelet count, blood urea nitrogen (BUN), glucose levels, serum creatinine (Scr), total cholesterol (TC), triglycerides (TG), high-density lipoprotein (HDL) cholesterol, low-density lipoprotein (LDL) cholesterol, C-reactive protein (CRP), glycosylated hemoglobin (HbA1c), uric acid (UA), hematocrit (HCT), hemoglobin (HGB). Current diseases (yes/no) included hypertension, diabetes, cancer, lung disease, stroke, liver disease, renal disease, digestive disease, asthma[10].

### Statistical analysis

All normally distributed continuous variables were reported as mean ± standard deviation, while skewed continuous variables were described as median (interquartile range [IQR]). Categorical variables were presented as frequencies and percentages. The comparison of continuous variables among groups was conducted using the independent samples Student’s t-test or Mann-Whitney U-test based on the distribution's normality. Categorical data were compared using the chi-square test as appropriate.

Multivariate Cox regression models were utilized to estimate hazard ratios (HRs) and their corresponding 95% confidence intervals (95% CI) for the heart disease. BMI and WC was included in the model as a continues and categorical variable according to clinical significance.

Confounding variables were selected based on clinical relevance, existing scientific literature, or if they were found to be associated with the outcomes of interest or caused a change in the effect estimate of more than 10%. Three models were constructed: Model 1, which was unadjusted analysis; Model 2, which adjusted for age, sex, marital status, and rural residence; Model 3 (the primary model), which additionally adjusted for age, sex, marital status, rural residence, smoking status, alcohol consumption, white blood cell count, platelet count, hemoglobin level, hypertension, diabetes, cancer, lung disease, stroke, liver disease, renal disease, digestive disease, and asthma.

We utilized a restricted cubic spline model to construct smooth curves in order to explore potential nonlinear dose-response relationships between BMI, WC and heart disease. In this model, BMI and WC was treated as a continuous variable with four knots (5th, 35th, 65th, and 95th percentiles) recommended by Harrell. Nonlinearity was assessed through a likelihood ratio test, which compared a model containing only a linear term with a model including both linear and cubic spline terms.

To account for missing data, we employed multiple imputation with 5 replications and the chained equation approach method using the R mice procedure, as outlined in Van Buuren and Groothuis-Oudshoorn (2011). This approach aimed to enhance statistical power and minimize bias. Additionally, we repeated all analyses using the complete data cohort for comparison purposes. Furthermore, we performed a series of sensitivity analyses to evaluate the robustness of our study findings and assess the impact of employing various association inference models.

In the sensitivity analysis, we applied several association inference models, including propensity score adjusted (PSA), propensity score matching (PSM), inverse probability of treatment weighting (IPTW), standardized mortality ratio weighting (SMRW), pairwise algorithmic (PA), and overlap weight (OW) models. The effect sizes and p-values obtained from these models were calculated and compared.

R software (version 4.2.1; R Foundation for Statistical Computing; http:// www.Rproject.org), the R survey package (version 4.1-1), and Free Statistics software (version 1.7.1; Beijing Free Clinical Medical Technology Co., Ltd.) were used for analyses. In all analyses, a two-sided p-value < 0.05 was taken to indicate statistical significance.

**Results**

**Flow chart of the study population inclusion**

Of a total of 17385 patients, 11700 patients were included. We excluded 2075 patients because of diagnosed with heart disease in 2011. Another 3610 patients were excluded because of Missing data on body mass index and waist circumference (Fig. 1).

## Baseline characteristic of participants

The baseline clinical characteristics of the included patients are summarized in **Table 1**. The participants were divided into two groups according to whether the WC was less than 85cm for men and less than 80cm for women. The mean age of the included patients was 58.6 ± 9.9. Among them, 52.3% were male. In high WC group, people tended to have higher levels of lipids, blood sugar, and inflammation and high incidence of hypertension, diabetes, stroke and digestive disease. During an median follow-up of 8.49 years, 2055 (17.6%) people were diagnosed with heart disease.

**Association of BMI and WC with heart disease**

In the multivariable Cox proportional hazards model, after adjusting for potential confounders as shown in **Table 2** **(model 3)**, A high BMI and WC was found to be significantly associated with an increased risk of heart disease (Per 1 unit: BMI, HR: 1.04, 95% CI: 1.02-1.05, P<0.001; WC, HR: 1.020, 95% CI: 1.010-1.021, P<0.001). In the multivariable Cox proportional hazard models, after adjusting for potential confounders (**Table 2, model 3**), individuals in the group2 of BMI and the group 2 of WC exhibited a higher risk of heart disease compared to the group 1 of BMI and the group 1 of WC (BMI. group 2 vs 1, HR: 1.41, 95% CI: 1.21-1.63, P<0.001; WC. group 2 vs 1, HR: 1.22, 95% CI: 1.09-1.36, P<0.001). Moreover, a linear relationship between the BMI, WC and heart disease was shown in **Figure S1**.

**Joint effect of BMI and WC with the risk of heart disease**

**Figure 2** shows the joint association of BMI and WC with the risk of heart disease. The HRs for individuals of high BMI (BMI ≥ 28.0 kg/m2) and high WC (WC ≥ 85cm in male, WC ≥ 80cm in female) compared with those with low BMI and low WC were 1.54 (95% CI: 1.34-1.77, P<0.001) for the risk of heart disease after adjusting for confounders (**Table 3**), which was higher than the group of high BMI and low WC and the group of low BMI and high WC.

But no significant additive interactions were found between BMI and WC on heart disease incidence, which requires further investigation (Additive: RERI: 0.14, 95% CI: -0.71-1.15, AP: 0.14, 95% CI: -0.46-0.75) (**Table 3**).

**Subgroup analysis, PSM analysis and other Sensitivity analyses**

Subgroup analysis, PSM analysis and other Sensitivity analyses were conducted to further explore the findings of the study. Subgroup analysis indicated no evidence of effect modification based on common risk factors for heart disease, as evidenced by HR all exceeding 1 (**Figure 3**).

Furthermore, propensity score matching analysis was employed to account for potential confounding variables between the BMI and WC groups, aiming to ensure the robustness of the results. Even after adjusting for multiple factors, the results remained consistent and similar (**Figure 4**).

Additionally, a multivariable regression analysis was conducted using only patients with complete data as a sensitivity analysis, which yielded results consistent with the main findings (**Table S1**).

**Discussion**

To the best of our knowledge, this extensive retrospective cohort study on heart disease has demonstrated a significant independent association between BMI and WC and an increase in the risk of heart disease. It is noteworthy that the joint effect of BMI and WC on the incidence of heart disease requires further investigation. Further robustness of the results was achieved through subsequent subgroup analysis, PSM, and a multivariable COX proportional hazard model. These findings have substantial clinical significance[14-16].

Our research investigated the positive association and joint effect of BMI and WC with heart disease in the China Health and Retirement Longitudinal Study. Our findings are consistent with those of previous observational studies[17, 18]. For example, Chaofu Ke et al. found a significant association between obesity and increased risk of cardiometabolic multimorbidity in the Chinese population (BMI: HR: 1.48, 95% CI: 0.98-2.24; WC: HR: 2.06, 95% CI: 1.29-3.27)[19]. A recent longitudinal cohort study initiated by Zahra Raisi-Estabragh et al. showed a remarkable association between obesity and cardiovascular outcomes, while Sarah Lewington et al. found the same result[17].

We observed BMI, WC as an independent risk factor for heart disease in a large Chinese cohort population and demonstrated for the first time the joint effect of BMI and WC on heart disease risk[20-22]. Our findings support the characterization of obesity by integrating BMI and WC to better discriminate health from disease (minimize misclassification) and improve the prediction of cardiovascular outcomes[23-25].

The study has important strengths, including a large sample size, a population-based design, and the ability to simultaneously examine the risks of BMI and WC in relation to heart disease in different subgroups[26-28]. In an observational study, despite efforts to control for many important confounders, the possibility of unmeasured confounders associated with heart disease risk cannot be ruled out[29]. Although, sensitivity analyses after exclusion of some confounders did not alter the associations between BMI, WC, and major outcomes, it is acknowledged that there may still be residual confounding influencing the results[30].

# Conclusions

## In Chinese individuals, high BMI or WC was significantly associated with an increased risk of incident heart disease. What's more, the combined use of BMI and WC to characterize obesity may better discriminate "pathological" obesity and provide better estimates of cardiovascular risk than either measure alone.

**Declarations**

**Ethics approval and consent to participate**

Not applicable

**Consent for publication**

Not applicable

**Data availability statement**

The data that support the findings of this study are available from the China Health and Retirement Longitudinal Study (CHARLS) database, but restrictions apply to the availability of these data, which were used under license for the current study and so are not publicly available. Data are however available from the authors upon reasonable request and with permission of the China Health and Retirement Longitudinal Study (CHARLS) database. CHARLS web-site (<https://charls.pku.edu.cn/>).

**Disclosure statement**

The authors declare that they have no competing interests.

**Funding**

This research did not receive any specific grant from funding agencies.

**Author Contributions**

All authors made a significant contribution to the work reported, whether that is in the conception, study design, execution, acquisition of data, analysis and interpretation, or in all these areas; took part in drafting, revising or critically reviewing the article; gave final approval of the version to be published; have agreed on the journal to which the article has been submitted; and agree to be accountable for all aspects of the work.

**Acknowledgments**

We thank Dr. Jie Liu(People’s Liberation Army of China General Hospital, Beijing, China) , Dr. Haibo Li(Peking Union Medical College Hospital)and Dr. Qilin Yang (The Second Affiliated Hospital of Guangzhou Medical University,Guangzhou, Guangdong, China) for helping in this revision.

**Supplementary material**

Supplementary material to this article can be found online Appendix A.

**Figure legends**

**Fig. 1** Flow chart of the study population inclusion.

**Fi. 2** BMI, associations with high risk of heart disease and interaction with WC. BMI: body mass index, WC: waist circumference.

**Fig. 3** Subgroup analyses for the association of BMI (A) and WC (B) with risk of heart disease. HR hazard ratio, CI confidence interval, BMI: body mass index, WC: waist circumference.

**Fig. 4** Forest plot shows HRs of heart disease in BMI group (A) and WC (group) using propensity score matching (PSM).

**Fig. S1** A multivariable-adjusted restricted cubic spline for the association of BMI (A) and WC (B) with heart disease. Adjusted for age, sex, marry state, rural, smoke, drink, WBC, Platelet, HGB, hypertension, diabetes, cancer, lung disease, stroke, liver disease, renal disease, digestive disease, asthma. BMI: body mass index, WC: waist circumference.

**Reference**

1. Lin H, Xiao N, Lin S, Liu M, Liu GG: **Associations of hypertension, diabetes and heart disease risk with body mass index in older Chinese adults: a population-based cohort study**. *BMJ open* 2024, **14**(7):e083443.

2. Bendor CD, Bardugo A, Pinhas-Hamiel O, Afek A, Twig G: **Cardiovascular morbidity, diabetes and cancer risk among children and adolescents with severe obesity**. *Cardiovascular diabetology* 2020, **19**(1):79.

3. Meyer JF, Larsen SB, Blond K, Damsgaard CT, Bjerregaard LG, Baker JL: **Associations between body mass index and height during childhood and adolescence and the risk of coronary heart disease in adulthood: A systematic review and meta-analysis**. *Obesity reviews : an official journal of the International Association for the Study of Obesity* 2021, **22**(9):e13276.

4. Isogai T, Okada A, Morita K, Michihata N, Makito K, Matsui H, Fushimi K, Yasunaga H: **Body Mass Index and Outcomes in Patients with Takotsubo Syndrome: A Nationwide Retrospective Cohort Study**. *Cardiology* 2024, **149**(4):314-324.

5. Huo RR, Liao Q, Zhai L, You XM, Zuo YL: **Interacting and joint effects of triglyceride-glucose index (TyG) and body mass index on stroke risk and the mediating role of TyG in middle-aged and older Chinese adults: a nationwide prospective cohort study**. *Cardiovascular diabetology* 2024, **23**(1):30.

6. Zeng ZQ, Ma Y, Yang C, Yu CQ, Sun DJY, Pei P, Du HD, Chen JS, Chen ZM, Li LM *et al*: **[Associations of body mass index and waist circumference with risk of chronic kidney disease in adults in China]**. *Zhonghua liu xing bing xue za zhi = Zhonghua liuxingbingxue zazhi* 2024, **45**(7):903-913.

7. Tagbo SO, Abebe D, Oguoma VM: **Overweight and obesity among non-pregnant women of reproductive age in Nigeria: findings from the 2008-2018 Nigerian Demographic and Health Survey**. *Public health* 2021, **198**:348-357.

8. Quesada O, Lauzon M, Buttle R, Wei J, Suppogu N, Kelsey SF, Reis SE, Shaw LJ, Sopko G, Handberg E *et al*: **Body weight and physical fitness in women with ischaemic heart disease: does physical fitness contribute to our understanding of the obesity paradox in women?** *European journal of preventive cardiology* 2022, **29**(12):1608-1614.

9. Botoseneanu A, Markwardt S, Nagel CL, Allore HG, Newsom JT, Dorr DA, Quiñones AR: **Multimorbidity Accumulation Among Middle-Aged Americans: Differences by Race/Ethnicity and Body Mass Index**. *The journals of gerontology Series A, Biological sciences and medical sciences* 2022, **77**(2):e89-e97.

10. Zhao Y, Hu Y, Smith JP, Strauss J, Yang G: **Cohort profile: the China Health and Retirement Longitudinal Study (CHARLS)**. *International journal of epidemiology* 2014, **43**(1):61-68.

11. Laakso PTT, Ortega FB, Huotari P, Tolvanen AJ, Kujala UM, Jaakkola TT: **The association of adolescent fitness with cardiometabolic diseases in late adulthood: A 45-year longitudinal study**. *Scandinavian journal of medicine & science in sports* 2024, **34**(1):e14529.

12. Do WL, Nguyen S, Yao J, Guo X, Whitsel EA, Demerath E, Rotter JI, Rich SS, Lange L, Ding J *et al*: **Associations between DNA methylation and BMI vary by metabolic health status: a potential link to disparate cardiovascular outcomes**. *Clinical epigenetics* 2021, **13**(1):230.

13. Li B, Zhang Y, Zheng Y, Cai H: **The causal effect of Helicobacter pylori infection on coronary heart disease is mediated by the body mass index: a Mendelian randomization study**. *Sci Rep* 2024, **14**(1):1688.

14. Mozafar Saadati H, Sabour S, Mansournia MA, Mehrabi Y, Hashemi Nazari SS: **Effect modification of general and central obesity by sex and age on cardiovascular outcomes: Targeted maximum likelihood estimation in the atherosclerosis risk in communities study**. *Diabetes & metabolic syndrome* 2021, **15**(2):479-485.

15. Iona A, Bragg F, Fairhurst-Hunter Z, Millwood IY, Wright N, Lin K, Yang L, Du H, Chen Y, Pei P *et al*: **Conventional and genetic associations of BMI with major vascular and non-vascular disease incidence and mortality in a relatively lean Chinese population: U-shaped relationship revisited**. *International journal of epidemiology* 2024, **53**(5).

16. Zhang JF, Jin YJ, Wei H, Yao ZQ, Zhao JX: **[Correlation analysis between body mass index and clinical characteristics of rheumatoid arthritis]**. *Beijing da xue xue bao Yi xue ban = Journal of Peking University Health sciences* 2023, **55**(6):993-999.

17. Szabo L, McCracken C, Cooper J, Rider OJ, Vago H, Merkely B, Harvey NC, Neubauer S, Petersen SE, Raisi-Estabragh Z: **The role of obesity-related cardiovascular remodelling in mediating incident cardiovascular outcomes: a population-based observational study**. *European heart journal Cardiovascular Imaging* 2023, **24**(7):921-929.

18. Trichia E, Malden DE, Jin D, Wright N, Taylor H, Karpe F, Sherliker P, Murgia F, Hopewell JC, Lacey B *et al*: **Independent relevance of adiposity measures to coronary heart disease risk among 0.5 million adults in UK Biobank**. *International journal of epidemiology* 2023, **52**(6):1836-1844.

19. Lu Y, Liu S, Qiao Y, Li G, Wu Y, Ke C: **Waist-to-height ratio, waist circumference, body mass index, waist divided by height(0.5) and the risk of cardiometabolic multimorbidity: A national longitudinal cohort study**. *Nutrition, metabolism, and cardiovascular diseases : NMCD* 2021, **31**(9):2644-2651.

20. Held C, Hadziosmanovic N, Aylward PE, Hagström E, Hochman JS, Stewart RAH, White HD, Wallentin L: **Body Mass Index and Association With Cardiovascular Outcomes in Patients With Stable Coronary Heart Disease - A STABILITY Substudy**. *Journal of the American Heart Association* 2022, **11**(3):e023667.

21. Dai C, Xu H, Chu T, Cao B, Ge J: **Body mass index and postoperative mortality in patients undergoing coronary artery bypass graft surgery plus valve replacement: a retrospective cohort study**. *PeerJ* 2022, **10**:e13601.

22. Åberg M, Robertson J, Djekic D, Rosengren A, Schaufelberger M, Kuhn G, Åberg ND, Schiöler L, Lindgren M: **Body Weight in Adolescent Men in Sweden and Risk of an Early Acute Coronary Event: A Prospective Population-Based Study**. *Journal of the American Heart Association* 2023, **12**(12):e029336.

23. Voortman T, Chen Z, Girschik C, Kavousi M, Franco OH, Braun KVE: **Associations between macronutrient intake and coronary heart disease (CHD): The Rotterdam Study**. *Clinical nutrition (Edinburgh, Scotland)* 2021, **40**(11):5494-5499.

24. Jeong S, Choi S, Chang J, Kim K, Kim SM, Hwang SY, Son JS, Lee G, Park SM: **Association of weight fluctuation with cardiovascular disease risk among initially obese adults**. *Sci Rep* 2021, **11**(1):10152.

25. Kim K, Di Giovanna E, Jung H, Bethineedi LD, Jun TJ, Kim YH: **Association of metabolic health and obesity with coronary heart disease in adult cancer survivors**. *Eur J Clin Invest* 2024, **54**(5):e14161.

26. Huang R, Kong X, Geng R, Wu J, Chen T, Li J, Li C, Wu Y, You D, Zhao Y *et al*: **Joint and interactive associations of body mass index and genetic factors with cardiovascular disease: a prospective study in UK Biobank**. *BMC public health* 2024, **24**(1):2371.

27. Poorthuis MHF, Sherliker P, de Borst GJ, Carter JL, Lam KBH, Jones NR, Halliday A, Lewington S, Bulbulia R: **Joint Associations Between Body Mass Index and Waist Circumference With Atrial Fibrillation in Men and Women**. *Journal of the American Heart Association* 2021, **10**(8):e019025.

28. Chen F, Shi Y, Yu M, Hu Y, Li T, Cheng Y, Xu T, Liu J: **Joint effect of BMI and metabolic status on mortality among adults: a population-based longitudinal study in United States**. *Sci Rep* 2024, **14**(1):2775.

29. Keramat SA, Alam K, Rana RH, Chowdhury R, Farjana F, Hashmi R, Gow J, Biddle SJH: **Obesity and the risk of developing chronic diseases in middle-aged and older adults: Findings from an Australian longitudinal population survey, 2009-2017**. *PLoS One* 2021, **16**(11):e0260158.

30. Armas Rojas NB, Lacey B, Soni M, Charles S, Carter J, Varona-Pérez P, Burrett JA, Martínez MC, Lorenzo-Vázquez E, Constantén SB *et al*: **Body-mass index, blood pressure, diabetes and cardiovascular mortality in Cuba: prospective study of 146,556 participants**. *BMC public health* 2021, **21**(1):963.
